# Supplementary material for: CD47-blocking Antibody ZL-1201 Promotes Tumor-associated Macrophage Phagocytic Activity and Enhances the Efficacy of the Therapeutic Antibodies and Chemotherapy
Source: PubMed Central journal article supplement (PMC10035405; doi:10.1158/2767-9764.crc-22-0266), 2022-11-10
Supplement: crc-22-0266-s02.pdf [file crc-22-0266-s02.pdf]

# Figure S2

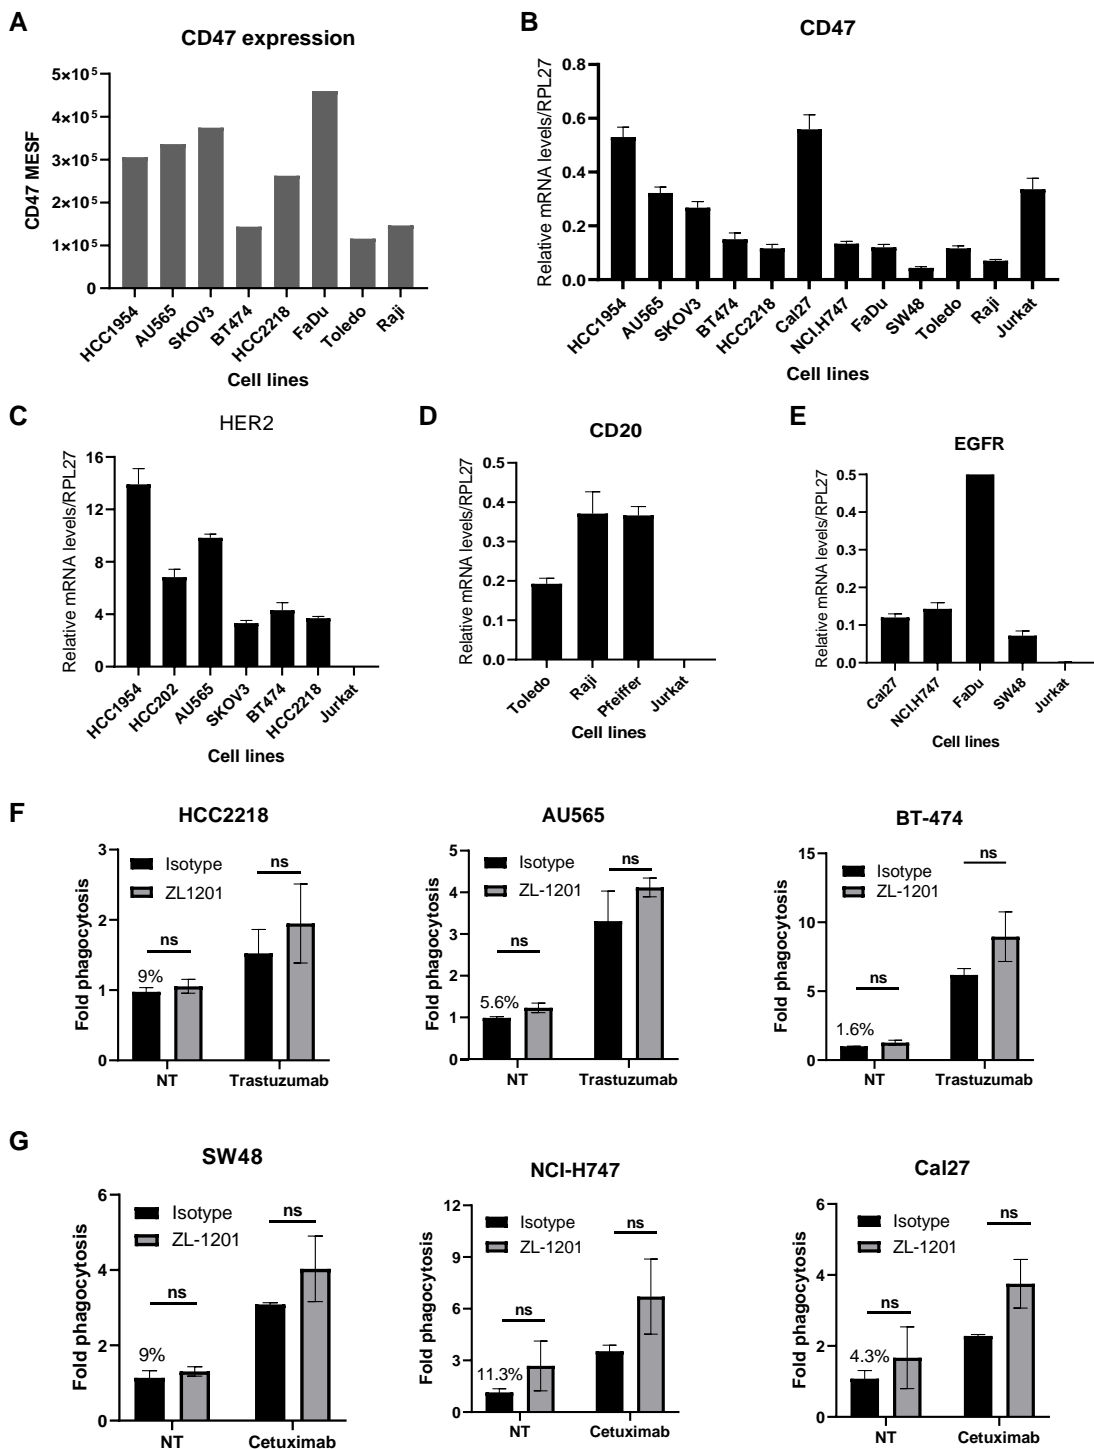

**Figure S2.** A. CD47 surface expression levels in various cancer models measured by flow cytometry analysis. B-E, CD47 (B), HER2 (C), CD20 (D) and EGFR (E) transcript levels in cancer models were measured by RT-qPCR analysis relative to internal control RPL27. F, In vitro phagocytosis of HER2-amplified solid tumor cells including HCC2218, AU565, and BT-474 treated with isotype control (10 $\mu$ g/mL), ZL-1201 (10 $\mu$ g/mL), trastuzumab (0.1 $\mu$ g/mL), or their combination. G. In vitro phagocytosis of EGFR-driven SW48, NCI-H747, and Cal27 cells treated with isotype control (10 $\mu$ g/mL), ZL-1201 (10 $\mu$ g/mL), cetuximab (0.1 $\mu$ g/mL), or their combination. Fold phagocytosis in F and G was calculated relative to isotype in non-treated (NT) conditions, the raw phagocytosis percentages are indicated in each figure. Data was shown as mean  $\pm$  SD; \* $p$ <0.05, \*\* $p$ <0.01, \*\*\* $p$ <0.001.
