# Supplementary material for: CD47-blocking Antibody ZL-1201 Promotes Tumor-associated Macrophage Phagocytic Activity and Enhances the Efficacy of the Therapeutic Antibodies and Chemotherapy
Source: PubMed Central journal article supplement (PMC10035405; doi:10.1158/2767-9764.crc-22-0266), 2022-11-10
Supplement: crc-22-0266-s04.pdf [file crc-22-0266-s04.pdf]

# Figure S4

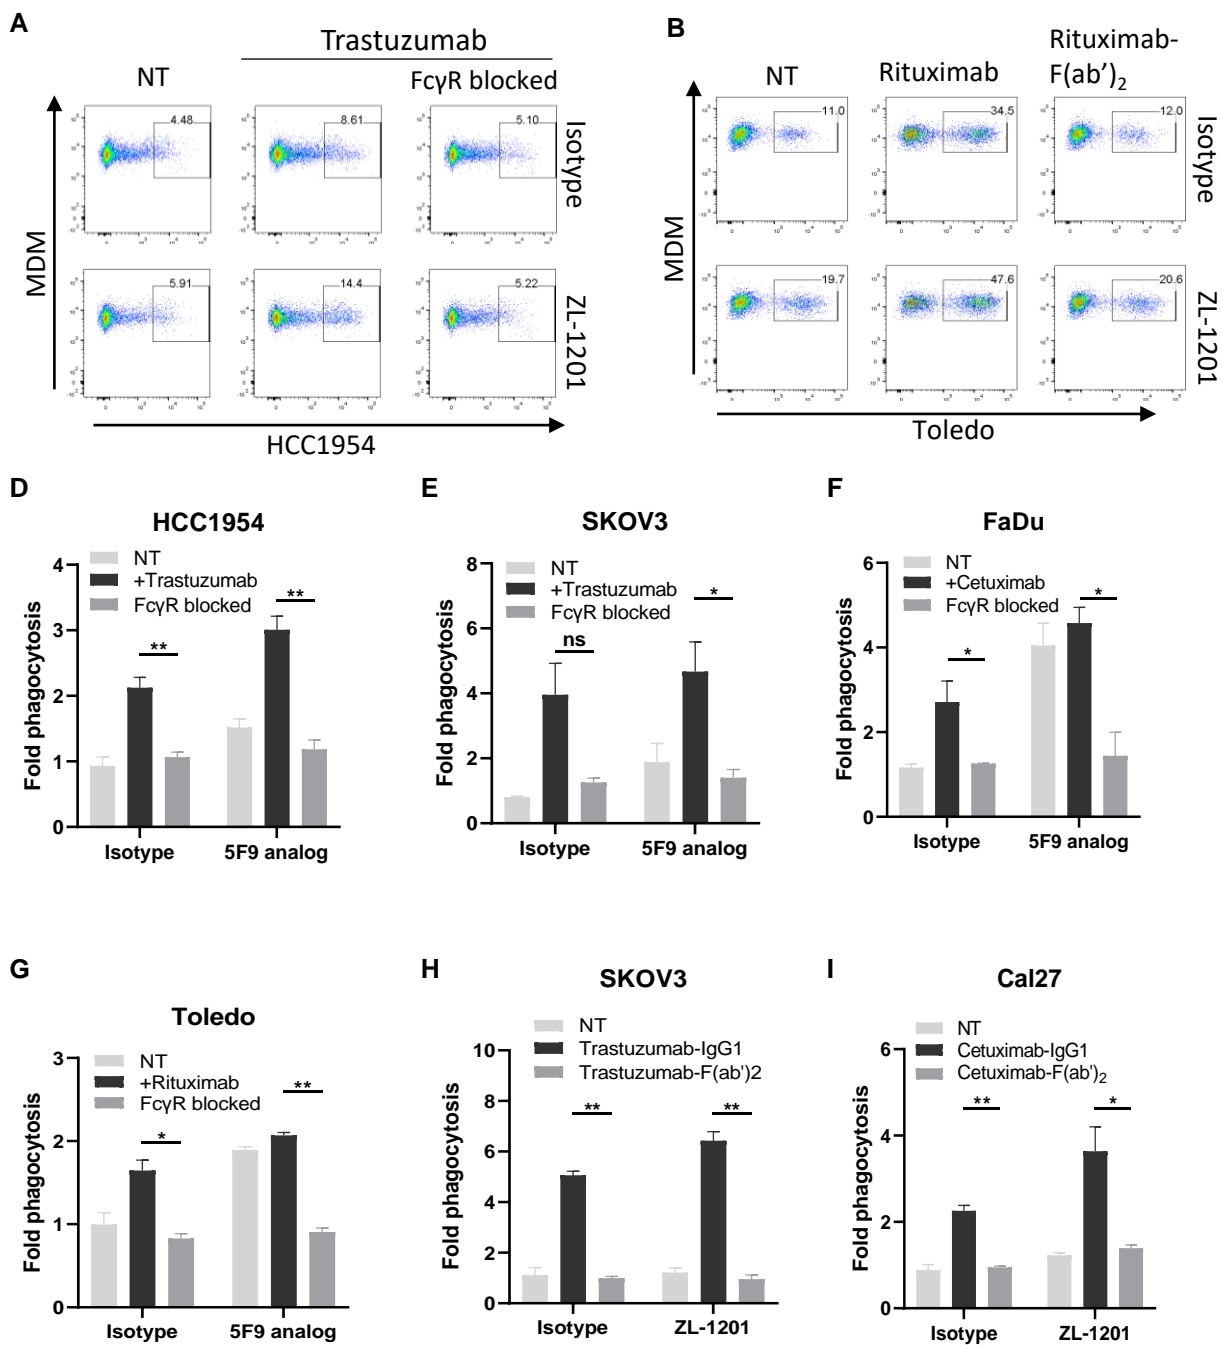

**Figure S4.** A, Flow cytometry dot plots showing in vitro phagocytosis of ZL-1201 in combination with trastuzumab with or without Fc $\gamma$ R blockade on HCC1954 cells. B. Flow cytometry dot plots showing in vitro phagocytosis of ZL-1201 in combination with rituximab-IgG1 or rituximab –(Fab')<sub>2</sub> on Toledo cells. D-G. In vitro phagocytosis of HCC1954 (D), SKOV3 (E), FaDu (F), or Toledo (G) treated with isotype or benchmark in combination with trastuzumab (D and E), cetuximab (F) or rituximab (G) (0.1  $\mu$ g/mL) with or without Fc $\gamma$ R blockade. H, I. In vitro phagocytosis of SKOV3 (H) and Cal27 (I) treated with isotype control (NT), ZL-1201 in combination with trastuzumab-IgG1 or trastuzumab –F(ab')<sub>2</sub> (H); or cetuximab-IgG1 or cetuximab –F(ab')<sub>2</sub> (I). Data shown as mean  $\pm$  SD, \*p<0.05, \*\*p<0.01.
