# Supplementary material for: CD47-blocking Antibody ZL-1201 Promotes Tumor-associated Macrophage Phagocytic Activity and Enhances the Efficacy of the Therapeutic Antibodies and Chemotherapy
Source: PubMed Central journal article supplement (PMC10035405; doi:10.1158/2767-9764.crc-22-0266), 2022-11-10
Supplement: crc-22-0266-s06.pdf [file crc-22-0266-s06.pdf]

# Figure S6

**A**

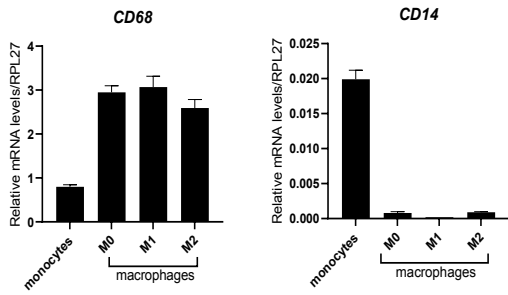

**B**

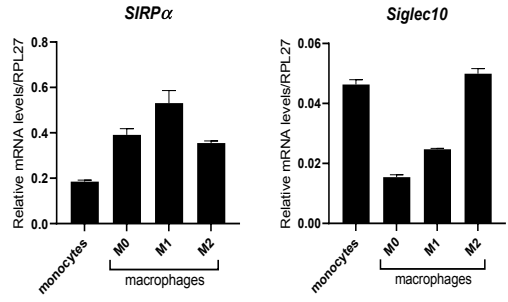

**C**

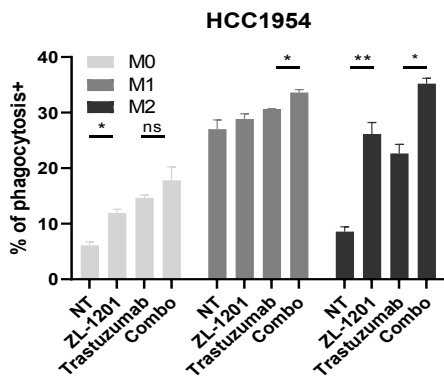

**D**

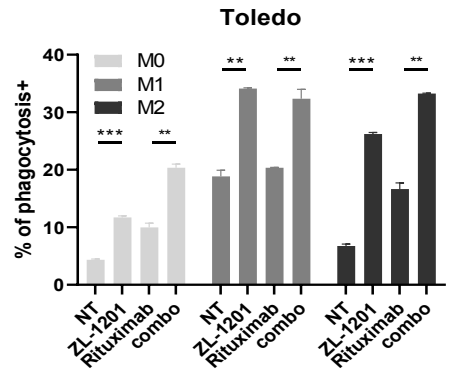

**E**

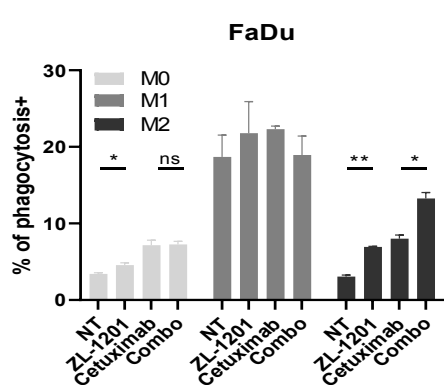

**F**

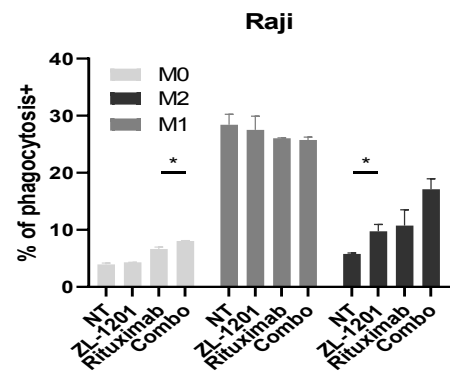

**G**

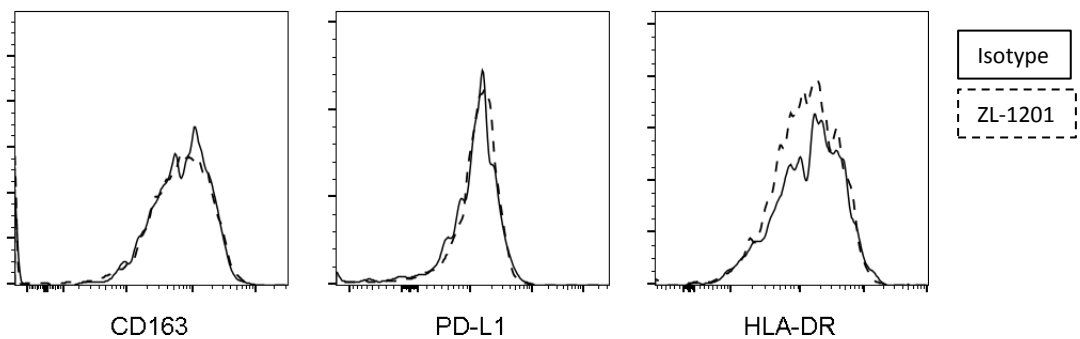

**Figure S6.** A. CD68 and CD14 transcript levels in monocytes and differentiated M0, M1 and M2 macrophages. B. Siglec10 and SIRP $\alpha$  transcript levels in monocytes and differentiated M0, M1 and M2 macrophages. C-F. in vitro phagocytosis using HCC1954 (C), Toledo (D), FaDu (E), and Raji (F) cancer cells and differentiated M0, M1, or M2 macrophages under the treatment conditions as indicated. Percentage (%) phagocytosis was shown as mean  $\pm$  SD. Student t-tests were performed comparing +/- ZL-1201, \* $p < 0.05$ , \*\* $p < 0.01$ , \*\*\* $p < 0.001$ . G. Flow histogram showing CD163, PD-L1, and HLA-DR levels in M2 macrophages treated with either isotype (solid line) or ZL-1201 (dotted line) after phagocytosis of FaDu cells.
