# Supplementary material for: CD47-blocking Antibody ZL-1201 Promotes Tumor-associated Macrophage Phagocytic Activity and Enhances the Efficacy of the Therapeutic Antibodies and Chemotherapy
Source: PubMed Central journal article supplement (PMC10035405; doi:10.1158/2767-9764.crc-22-0266), 2022-11-10
Supplement: crc-22-0266-s07.pdf [file crc-22-0266-s07.pdf]

# Figure S7

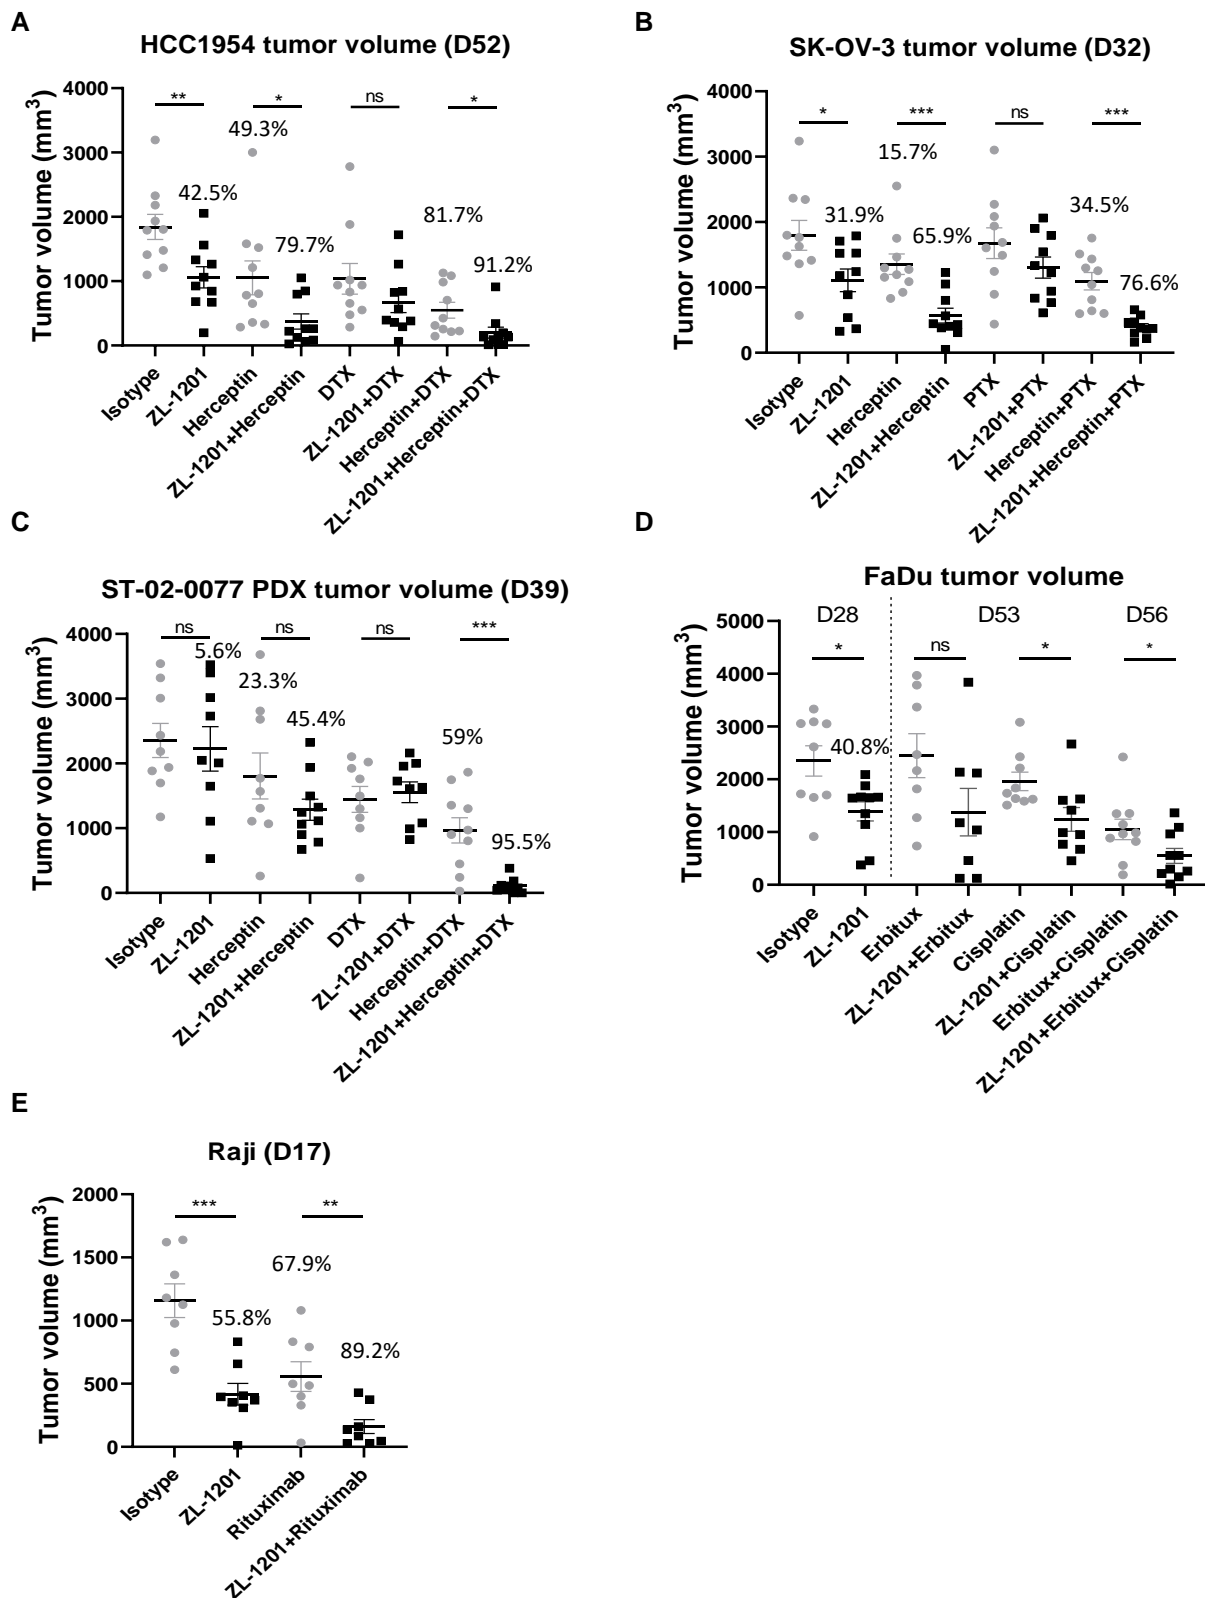

**Figure S7.** A. Individual tumor volumes of HCC1954 breast cancer xenograft in efficacy study shown in Figure 6A at day 52 post-treatment as shown. B. Individual tumor volumes of SKOV3 ovarian cancer xenograft in efficacy study shown in Figure 6B at day 32 post-treatment as shown. C. Individual tumor volumes of ST-02-0077 gastric PDX model in efficacy study shown in Figure 6C at day 39 post-treatment as shown. D. Individual tumor volumes of FaDu HNSCC xenograft in efficacy study shown in Figure 6D at day 28, 53 or 56 post-treatments as shown. E. Individual tumor volumes of Raji lymphoma xenograft in efficacy study shown in Figure 6E at day 17 post-treatment as shown. Percentage in the figure show tumor growth inhibition (%) relative to isotype treatment. TGI in D was calculated on D28 post-treatment. \* $p < 0.05$ , \*\* $p < 0.01$ , \*\*\* $p < 0.001$ .
