# Supplementary material for: CD47-blocking Antibody ZL-1201 Promotes Tumor-associated Macrophage Phagocytic Activity and Enhances the Efficacy of the Therapeutic Antibodies and Chemotherapy
Source: PubMed Central journal article supplement (PMC10035405; doi:10.1158/2767-9764.crc-22-0266), 2022-11-10
Supplement: crc-22-0266-s08.pdf [file crc-22-0266-s08.pdf]

# Figure S8

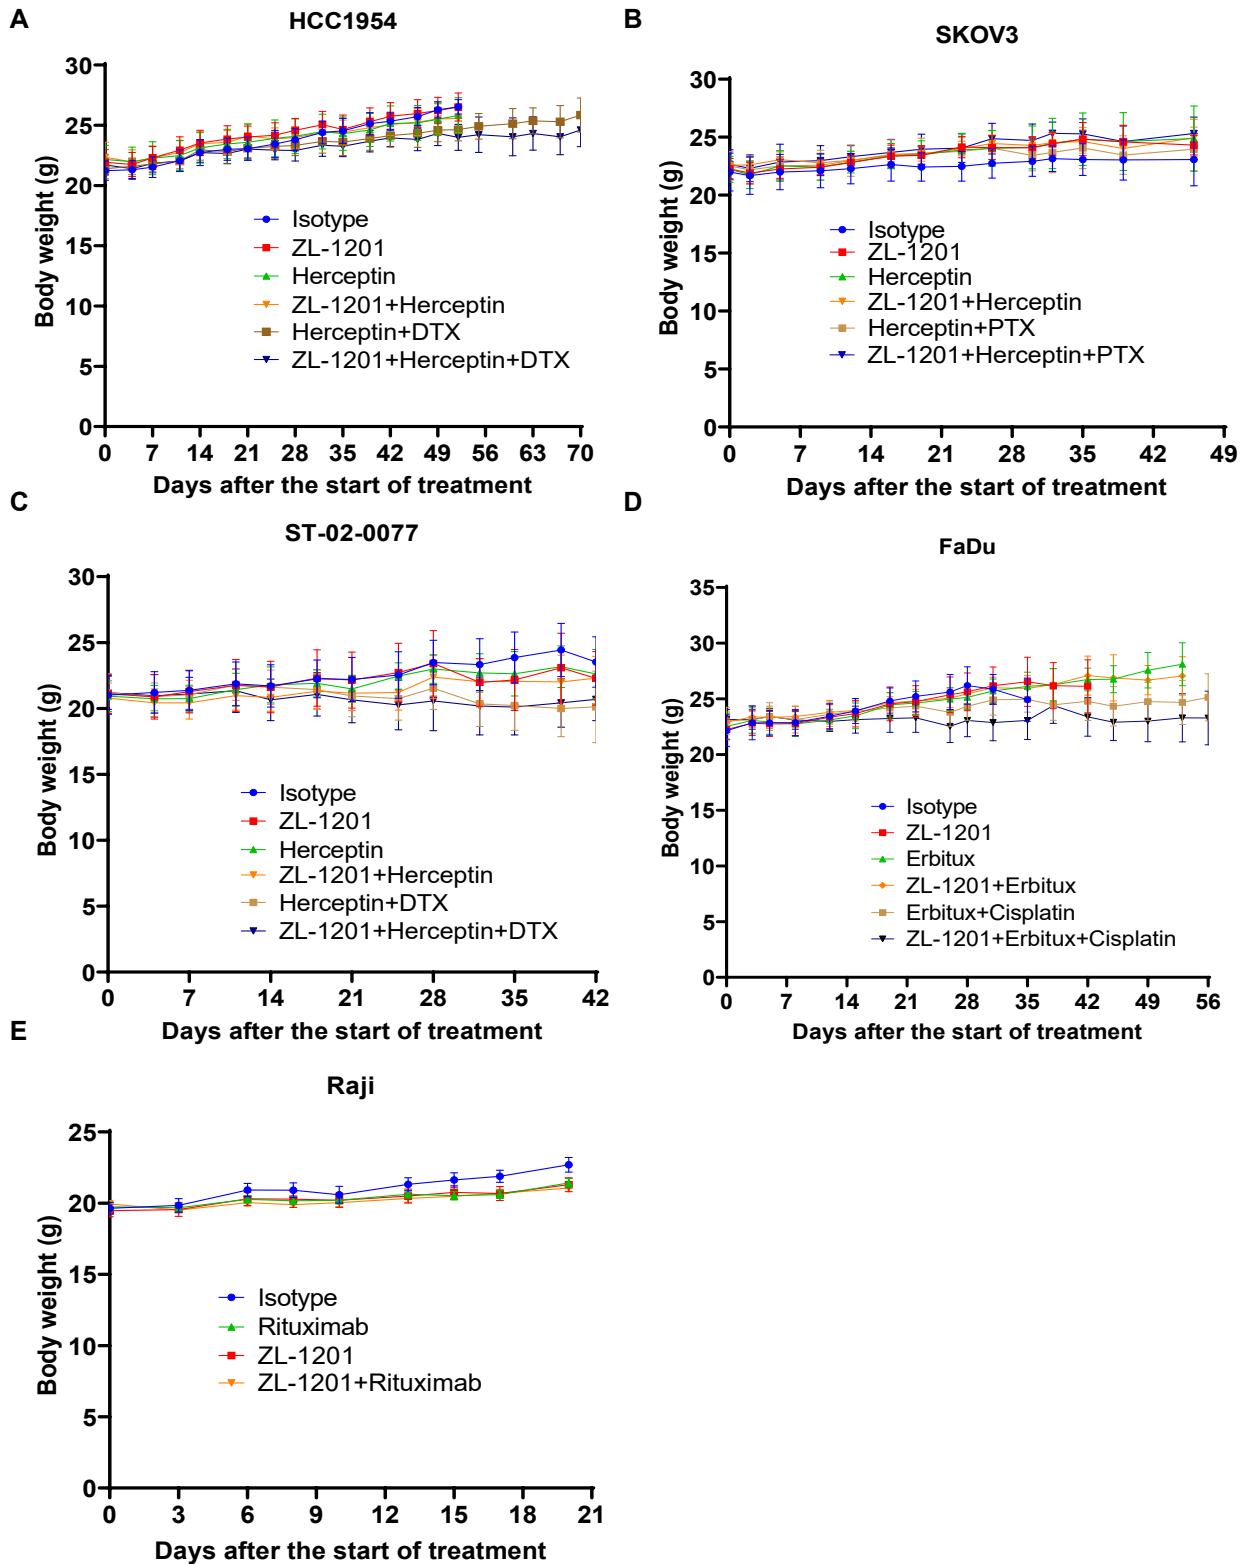

**Figure S8.** A-E. Body weights of mice in HCC1954(A), SKOV3(B), ST-02-0077(C), FaDu (D), and Raji(E) xenograft efficacy studies shown in Figure 5 at days post-treatment as shown. Data are shown as mean  $\pm$  SEM.
